# Supplementary material
Source: PubMed Central journal article supplement (PMC2868982)
Supplement: 737535.f1.pdf [file 737535.f1.pdf]

## **Supplementary**

### **Materials and Methods**

QSG-7701 cells were transfected with recombinant plasmids pMT3A and sMT3A using Lipofectamine<sup>TM</sup> 2000 according to the manufacturer's protocols (Invitrogen Corp., Carlsbad, CA). QSG-7701 cells were transfected with pMT3A and labeled as 7701-pMT3A cell lines; these were transfected with sMT3A and were designated as 7701-sMT3A cell lines or control.

Cell proliferation, Colony formation assay and PTEN expression analysis were performed followed as methods description in the manuscript.

### **Results**

DNMT3A siRNA construct suppress DNMT3A specifically in QSG-7701 cells (Suppl Fig.1A). Depletion of DNMT3A inhibits cell proliferation (Suppl Fig.1B) and colony formation in QSG-7701 cells (Suppl Fig.1C), although the inhibition on proliferation ability is delayed. In DNMT3A-depletion QSG-7701 cells, restored expression of PTEN was examined by qPCR (Suppl Fig.1D).

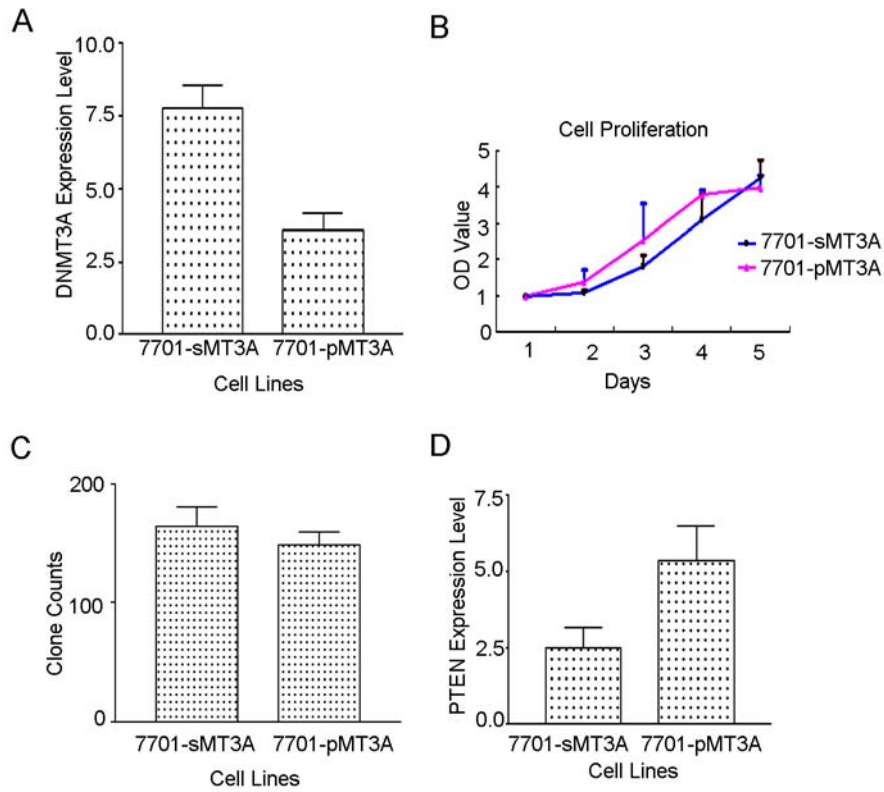

Zhao ZJ et al. Suppl. Figure 1

(A) DNMT3A siRNA construct suppress DNMT3A specifically in QSG-7701 cells. (B) Depletion of DNMT3A inhibits cell proliferation in QSG-7701 cells. (C) Depletion of DNMT3A inhibits colony formation in QSG-7701 cells. (D) Restored expression of PTEN was examined by qPCR in DNMT3A-depletion QSG-7701 cells,.
